# Supplementary material for: Epidemiology, Clinical, and Microbiological Characteristics of Multidrug-Resistant Gram-Negative Bacteremia in Qatar
Source: MDPI journal article supplement (doi:10.3390/antibiotics13040320), 2024-03-31
Supplement: s1 [file s1]

Figure S1: Study flow chart of MDR Gram negative bacteria blood stream infections collected during 2019.

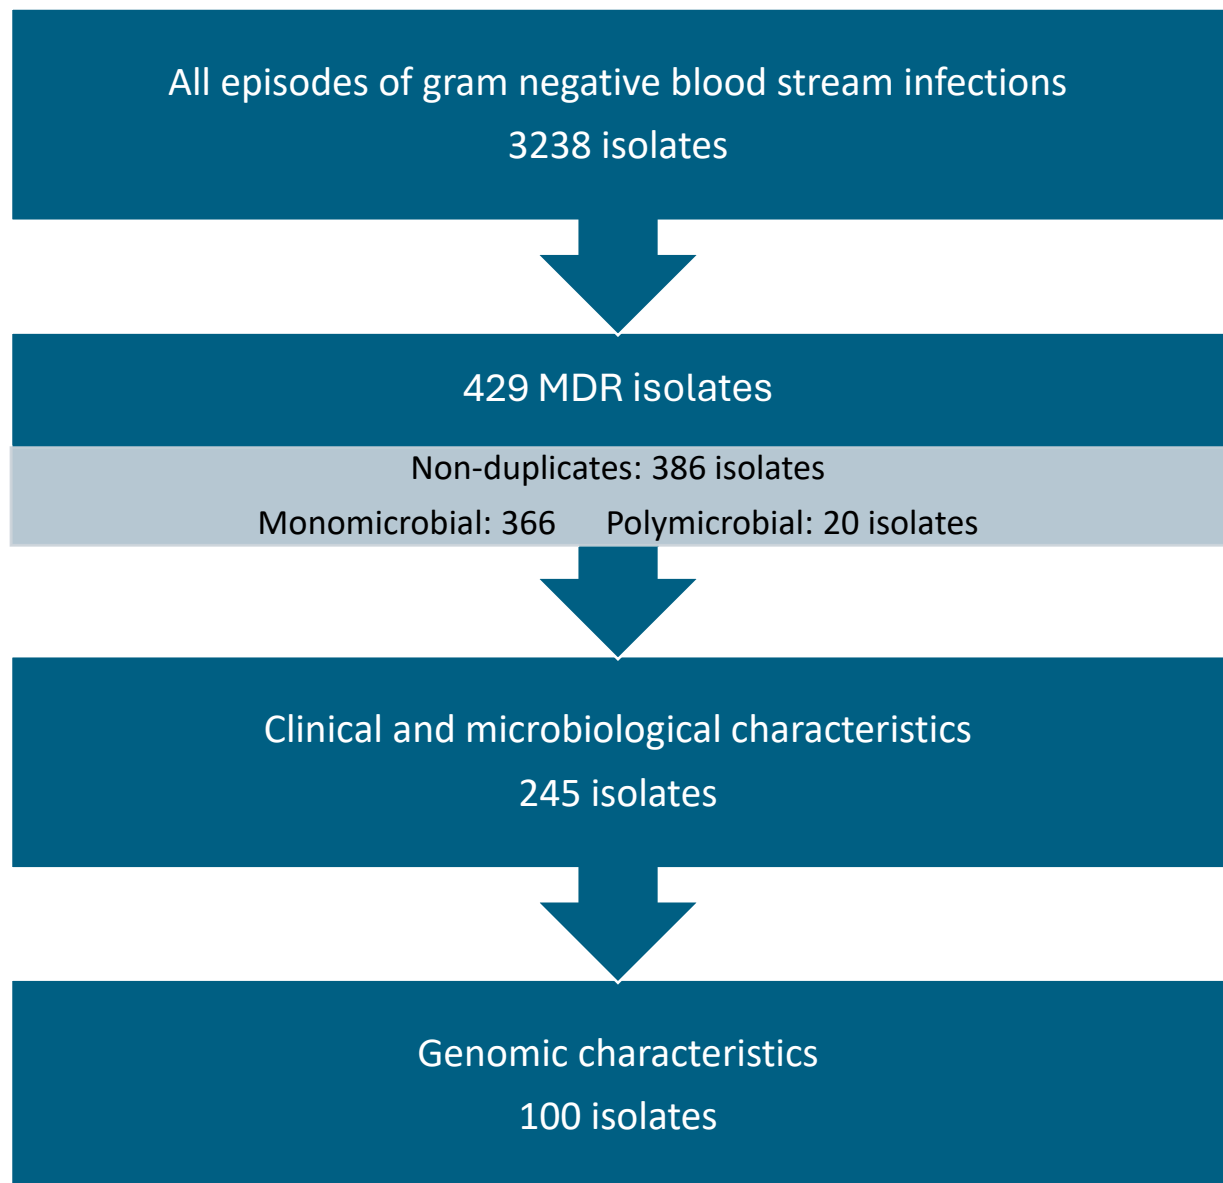

MDR : multidrug resistant
